# Supplementary material for: Correlation between Glucokinase Regulator (GCKR) Gene Polymorphisms and Serum Uric Acid Levels in Taiwanese Adolescents
Source: Research Square preprint supplement (doi:10.21203/rs.3.rs-729848/v1), 2021-07-26
Supplement: Supplementary file 1 [file 0a554a46cfdc006b9112b516.docx]

Table 1 Demographic characteristics of the study population

| Group | All (962) | Boys (468) | Girls (494) | p |
| --- | --- | --- | --- | --- |
| Age (years) | 13.3 ± 1.0 | 13.3 ± 1.0 | 13.4 ± 1.0 | 0.166 |
| FPG (mg/dl) | 92.7 ± 6.7 | 93.8 ± 6.4 | 91.8 ± 6.8 | <0.001 |
| BMI (Kg/m2) | 21.0 ± 3.9 | 21.6 ± 4.2 | 20.4 ± 3.4 | <0.001 |
| WC (cm) | 76.4 ± 9.8 | 78.7 ± 10.8 | 74.3 ± 8.2 | <0.001 |
| SBP (mmHg) | 114.8 ± 13.7 | 118.2 ± 14.2 | 111.6 ± 12.4 | <0.001 |
| DBP (mmHg) | 69.7 ± 10.0 | 69.3 ± 10.6 | 70.0 ± 9.4 | 0.291 |
| HDL-C (mg/dl) | 49.7 ± 11.5 | 47.5 ± 11.3 | 51.8 ± 11.2 | <0.001 |
| TG (mg/dl) | 71.2 ± 35.0 | 70.9 ± 38.9 | 71.6 ± 31.8 | 0.112 |
| Uric acid (mg/dl) | 5.98 ± 0.05 | 6.68 ± 0.06 | 5.23 ± 0.04 | <0.001 |
