# Supplementary material for: Correlation between Glucokinase Regulator (GCKR) Gene Polymorphisms and Serum Uric Acid Levels in Taiwanese Adolescents
Source: Research Square preprint supplement (doi:10.21203/rs.3.rs-729848/v1), 2021-07-26
Supplement: Supplementary file 2 [file 3b9fea3e4ebd95caa32f60af.docx]

Table 3. GCKR genotypes and abnormal uric acid frequencies in Taiwanese children

|  | NUA n (%) | HUA n (%) | p value |
| --- | --- | --- | --- |
| Boys |  |  |  |
| GCKRrs1260326 |  |  | 0.188 |
| CC | 62(20.8%) | 25(14.5%) |  |
| CT | 162(54.4%) | 97(56.1%) |  |
| TT | 74(24.8%) | 51(29.5%) |  |
| GCKRrs780094 |  |  | 0.13 |
| CC | 66(22.1%) | 27(15.6%) |  |
| CT | 170(56.9%) | 99(57.2%) |  |
| TT | 63(21.1%) | 47(27.2%) |  |
|  |  |  |  |
| Girls |  |  |  |
| GCKRrs1260326 |  |  | 0.088 |
| CC | 110(26.8%) | 16(19.0%) |  |
| CT | 198(48.3%) | 38(45.2%) |  |
| TT | 102(24.9%) | 30(35.7%) |  |
| GCKRrs780094 |  |  | 0.112 |
| CC | 116(28.2%) | 16(19.0%) |  |
| CT | 199(48.4%) | 41(48.8%) |  |
| TT | 96(23.4%) | 27(32.1%) |  |

NUA: normal UA; HUA: hyperuricemia
