# Supplementary material for: Correlation between Glucokinase Regulator (GCKR) Gene Polymorphisms and Serum Uric Acid Levels in Taiwanese Adolescents
Source: Research Square preprint supplement (doi:10.21203/rs.3.rs-729848/v1), 2021-07-26
Supplement: Supplementary file 3 [file 51f9cf20e56e010c2b496025.docx]

Table 4. Logistic regression analyses of abnormal uric acid in Taiwanese children by GCKR gene genotypes (rs1260326、rs780094)

|  | Model 1 | Model 2 |
| --- | --- | --- |
| Boys |  |  |
| GCKRrs1260326 | OR (95% CI) | OR (95% CI) |
| CT vs. CC | 1.48 (0.88 to 2.52) | 1.40 (0.79 to 2.48) |
| TT vs. CC | 1.71 (0.95 to 3.07) | 1.56 (0.82 to 2.98) |
| TT vs (CC+ CT) | 1.27 (0.83 to 1.92) | 1.21 (0.76 to 1.93) |
| (CT +TT) vs CC | 1.56 (0.94 to 2.58) | 1.45 (0.84 to 2.51) |
| GCKRrs780094 | OR (95% CI) | OR (95% CI) |
| CT vs. CC | 1.42 (0.85 to 2.37) | 1.34 (0.77 to 2.32) |
| TT vs. CC | 1.82 (1.02 to 3.28) * | 1.65 (0.87 to 3.14) |
| TT vs (CC+ CT) | 1.40 (0.90 to 2.16) | 1.33 (0.82 to 2.15) |
| (CT +TT) vs CC | 1.53 (0.94 to 2.51) | 1.42 (0.83 to 2.42) |
| Girls |  |  |
| GCKRrs1260326 | OR (95% CI) | OR (95% CI) |
| CT vs. CC | 1.32 (0.70 to 2.47) | 1.47 (0.74 to 2.91) |
| TT vs. CC | 2.02 (1.04 to 3.93) * | 2.29 (1.11 to 4.73) * |
| TT vs (CC+ CT) | 1.68 (1.02 to 2.76) * | 1.75 (1.02 to 3.00) * |
| (CT +TT) vs CC | 1.56 (0.87 to 2.80) | 1.74 (0.92 to 3.30) |
| GCKRrs780094 | OR (95% CI) | OR (95% CI) |
| CT vs. CC | 1.49 (0.80 to 2.78) | 1.70 (0.87 to 3.32) |
| TT vs. CC | 2.04 (1.04 to 4.00) * | 2.28 (1.09 to 4.75) * |
| TT vs (CC+ CT) | 1.55 (0.93 to 2.59) | 1.58 (0.91 to 2.74) |
| (CT +TT) vs CC | 1.67 (0.93 to 3.00) | 1.88 (0.99 to 3.56) |

Model 1: univariate analysis, Model 2: adjusted for age, BMI, waist circumference, blood pressure, fasting plasma glucose, triglycerides, high density lipoprotein cholesterol

OR: odds ratio; CI: confidence interval

*Statistically significant differences
