# Supplementary material for: Correlation between Glucokinase Regulator (GCKR) Gene Polymorphisms and Serum Uric Acid Levels in Taiwanese Adolescents
Source: Research Square preprint supplement (doi:10.21203/rs.3.rs-729848/v1), 2021-07-26
Supplement: Supplementary file 4 [file 7b49f8b3c8def62243dac5dd.docx]

Table 2. GCKR Alleles and abnormal uric acid frequencies in Taiwanese children

|  | NUA n (%) | HUA n (%) | p value |
| --- | --- | --- | --- |
| Boys |  |  |  |
| GCKRrs1260326 |  |  | 0.102 |
| C | 286(48.0%) | 147(42.5%) |  |
| T | 310(52.0%) | 199(57.5%) |  |
| GCKRrs780094 |  |  | 0.063 |
| C | 302(50.5%) | 153(44.2%) |  |
| T | 296(49.5%) | 193(55.8%) |  |
|  |  |  |  |
| Girls |  |  |  |
| GCKRrs1260326 |  |  | 0.028* |
| C | 418(51.0%) | 70(41.7%) |  |
| T | 402(49.0%) | 98(58.3%) |  |
| GCKRrs780094 |  |  | 0.034* |
| C | 431(52.4%) | 73(43.5%) |  |
| T | 391(47.6%) | 95(56.5%) |  |

NUA: normal UA; HUA: hyperuricemia

*Statistically significant differences, p < 0.05
